# Supplementary material for: Resin-gel incorporation of high concentrations of W6+ and Zn2+ into TiO2-anatase crystal to form quaternary mixed-metal oxides: effect on the a lattice parameter and photodegradation efficiency
Source: Royal Society of Chemistry journal article supplement (doi:10.1039/c9ra07355h), 2019-01-01
Supplement: c9ra07355h1.pdf [file c9ra07355h1.pdf]

# Resin-gel High incorporation of high concentrations W<sup>6+</sup> and Zn<sup>2+</sup> into TiO<sub>2</sub>-Anatase crystal to form quaternary mixed-metal oxides: Effect on the a lattice parameter and photodegradation efficiency

Lerato Hlekelele<sup>\*a,b,c</sup>, Shane H. Durbach<sup>a,b</sup>, Vongani P. Chauke<sup>c</sup>, Farai Dziike<sup>a,b</sup>, Paul J. Franklyn<sup>a</sup>

<sup>a</sup>Molecular Science Institute, School of Chemistry, University of the Witwatersrand, Johannesburg, 2050, South Africa

<sup>b</sup>DST-NRF Centre of Excellence in Strong Materials, University of the Witwatersrand, WITS, 2050, Johannesburg, South Africa

<sup>c</sup>Polymers and Composites, Materials Science and Manufacturing, Council for Scientific and Industrial Research, P.O Box 395, 0001, Pretoria, South Africa

E-mail: [LHlekelele@csir.co.za](mailto:LHlekelele@csir.co.za)

## (S1) Sample composition

**Table S1** Sample names and calcination temperatures applied for the concentration study of the various QMMOs.

| Sample name      | % Ti <sup>4+</sup> | % W <sup>6+</sup> | Zn <sup>2+</sup> | Calcination temperature |
|------------------|--------------------|-------------------|------------------|-------------------------|
| TiO <sub>2</sub> | 100                | 0                 | 0                | 400                     |
| WO <sub>3</sub>  | 0                  | 100               | 0                | 400                     |
| ZnO              | 0                  | 0                 | 100              | 400                     |
| TWZ910           | 90                 | 10                | 0                | 400                     |
| TWZ901           | 90                 | 0                 | 10               | 400                     |
| TWZ820           | 80                 | 20                | 0                | 400                     |
| TWZ811           | 80                 | 10                | 10               | 400                     |
| TWZ802           | 80                 | 0                 | 20               | 400                     |
| TWZ730           | 70                 | 30                | 0                | 400                     |
| TWZ721           | 70                 | 20                | 10               | 400                     |
| TWZ712           | 70                 | 10                | 20               | 400                     |
| TWZ703           | 70                 | 0                 | 30               | 400                     |

## (S2) Photodegradation testing

Slurry consisting of 25 mg of the materials and a BPA solution (50 ml, 60 ppm) was first magnetically stirred for 2 h in the dark to ensure adsorption equilibrium. Each mixture was then exposed to light for 60 min with a solar simulator. The photocatalytic experiments were conducted using visible light, where a UV-light filter ( $\lambda > 400$  nm) was used. The light used was supplied using a 300 W Xenon Short Arc lamp (Eurolux). The lamp was placed 20 cm away from the sample to deliver radiation of 1000 W/m<sup>2</sup> measured using a monocrystalline

silicon photovoltaic cell. The reaction was carried out in an 80 ml quartz glass vessel. Periodically, during the photodegradation experiments, 1 ml aliquots were sampled and analyzed by high-performance liquid chromatography (HPLC) coupled with a photodiode array detector (UltiMate 3000). The analyte was eluted using a gradient method described in our previous work on a Phenomenex LUNA 5 mm C18 reversed-phase column.<sup>1,2</sup> The concentration of BPA was measured at 225 nm.

### (S3) PXRD analyses of pure metal oxides

PXRD analyses were performed in order to study the crystallographic structure of the pure metal oxides and the mixed metal oxides. The PXRD patterns of the calcined pure metals oxides, i.e.  $\text{TiO}_2$ ,  $\text{ZnO}$ , and  $\text{WO}_3$  are shown in Fig. S1. It was deduced from the PXRD of  $\text{ZnO}$  that the material was exclusively hexagonal wurtzite (Zincite, JCPDS 5-0664), with reflections at  $2\theta$  positions of 37.136; 40.069; 42.566; 56.102; 66.949, 74.655; 78.933; 80.971 and 82.322°, indexed as (100), (002), (101), (102), (110), (103), (200), (112) and (201). There are no other peaks observed which were not accounted for, indicating that the procedure yielded pure  $\text{ZnO}$ .

In the case of  $\text{WO}_3$ , a series of peaks, some of which were overlapping were observed on its PXRD pattern. The peaks are generally narrow and strong which was attributed to that the materials were highly crystalline and had fairly big particles. The main peaks at  $2\theta$  positions: 16.340; 26.967; 28.763; 32.153; 32.831; 33.509; 40.069; 43.001; 48.882; 58.813; and 65.831°, were indexed as: (100), (001), (110), (101), (200), (111), (201), (300), (002), (220), (202), (221) and (400) respectively (PDF card, 75-2187). All the diffraction peaks are that of hexagonal  $\text{WO}_3$ , indicating that the material synthesized is pure.

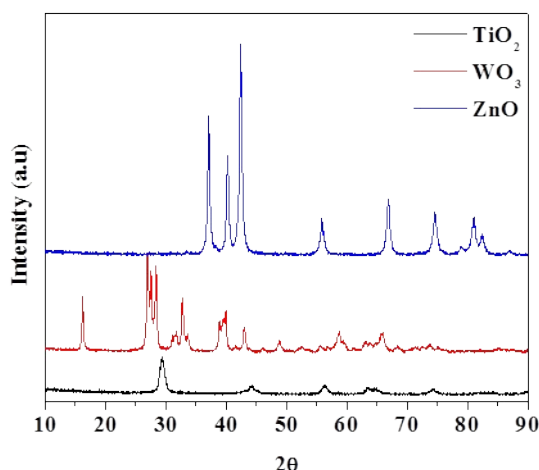

Fig. S1. PXRD patterns of  $\text{TiO}_2$ ,  $\text{WO}_3$ , and  $\text{ZnO}$ .

On the other hand, The PXRD of  $\text{TiO}_2$  has a series of peaks at 29.441; 44.356; 55.340; 63.797, 64.915; 74.286; 82.185; 83.568 and 86.247°, indexed as: (101), (004), (200), (105), (211), (204), (116), (220) and (215), and as it is the case with  $\text{ZnO}$  and  $\text{WO}_3$ , all the peaks were accounted for indicating that the synthesized material is pure  $\text{TiO}_2$  anatase.

#### (S4) TEM and EDS analyses of pure metal oxides

The pure metal oxides and the QMMOs were then analyzed by EDS to determine their elemental composition. TEM was used in order to study their morphological properties and particle size distribution. Here it was observed that the  $\text{WO}_3$  nanoparticles are predominantly hexagonal (Fig. S2a and Fig. S2b), which is consistent with the PXRD analyses (Fig. S1). The particle size of the  $\text{WO}_3$  nanoparticles ranged between 45 and 75 nm, with an average size of 55 nm as determined from TEM micrographs (Fig. S2b). EDS conducted on the particle shown in Fig. S2d showed that the material consisted of tungsten and oxygen (Fig. S2c). The copper peaks were present on the spectrum because a copper grid was used for specimen preparation (Fig. S2c).

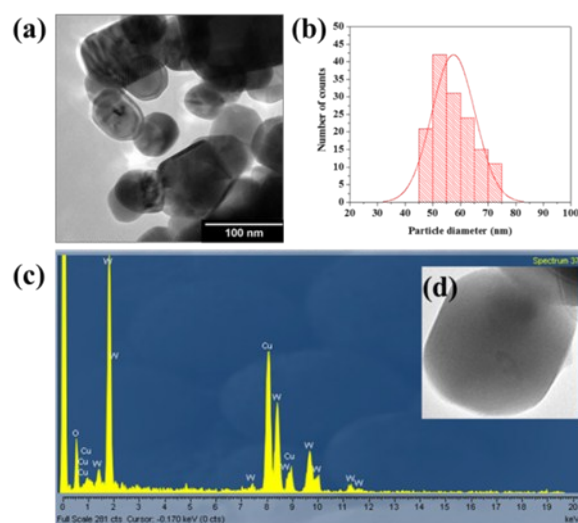

Fig. S2 (a) TEM image of  $\text{WO}_3$ , (b)  $\text{WO}_3$  particle size distribution, (c) EDS spectra of  $\text{WO}_3$  nanoparticles and (d) TEM image of particle which the EDS spectra was recorded on.

In the case of the  $\text{ZnO}$  sample, its morphology was found to inhomogeneous where some particles were found to be spherical and hexagonal in shape, whereas others had irregular facets (Fig. S3a). The diameter distribution of these particles ranged between 70-100 nm whilst most had a diameter of 85 nm as was determined from TEM micrographs by measuring *ca.* 100 particles from different images (Fig. S3b). As was the case with  $\text{WO}_3$  nanoparticles, the EDS spectrum of  $\text{ZnO}$  (Fig. S3c) conducted on the particle shown in Fig. S3d showed that the material consisted of only Zn and O. A small carbon peak was also observed, which was attributed to carbon soot that resisted the annealing/calcination step.

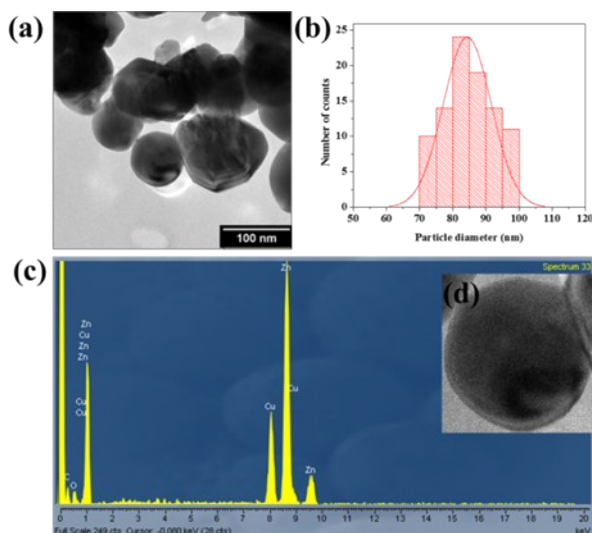

Fig. S3 (a) TEM image of ZnO, (b) ZnO particle size distribution, (c) EDS spectra of ZnO nanoparticles and (d) TEM image of particle which the EDS spectra was recorded on.

The morphological properties of  $\text{TiO}_2$  nanoparticles were also studied by TEM. It was observed from the TEM images of  $\text{TiO}_2$  nanoparticles that the sample consisted mostly of grain-like nanoparticles (Fig. S4a). These particles had sizes that ranged between 8 nm to 15 nm but were predominantly 11 nm (Fig. S4b). The EDS spectrum of  $\text{TiO}_2$  (Fig. S4c) recorded on the particle shown in Fig. S4d showed that the material consisted of only Ti and O atoms, while a carbon peak was also observed. The carbon peak observed was due to the unburned carbon during the combustion and subsequent calcination process. Therefore, it was demonstrated by PXRD, laser Raman spectroscopy, TEM and EDS that the resin gel method is a viable method for the synthesis of pure metal oxides.

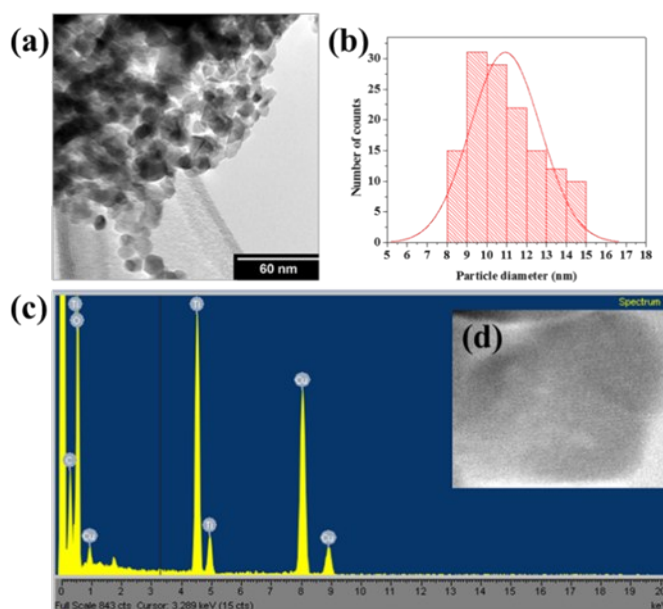

Fig. S4 (a) TEM image of  $\text{TiO}_2$ , (b)  $\text{TiO}_2$  particle size distribution, (c) EDS spectra of  $\text{TiO}_2$  nanoparticles and (d) TEM image of particle which the EDS spectra was recorded on.

### (S5) Laser Raman spectroscopy

Laser Raman spectroscopy analyses were conducted in order to confirm what was observed from the PXRD patterns of the various pure metal oxides. The laser Raman spectrum of ZnO nanoparticles (**Fig. S5a and Fig. S5b**) was observed to have been dominated by the two intense  $E_2$  modes at 108 and 438  $\text{cm}^{-1}$ . In addition, two more peaks were observed at 376 and 582  $\text{cm}^{-1}$  which corresponded to the  $A_1$  and  $E_1$  symmetry modes of ZnO. As was the case with PXRD data, the laser Raman spectrum showed that the material was pure wurtzite.

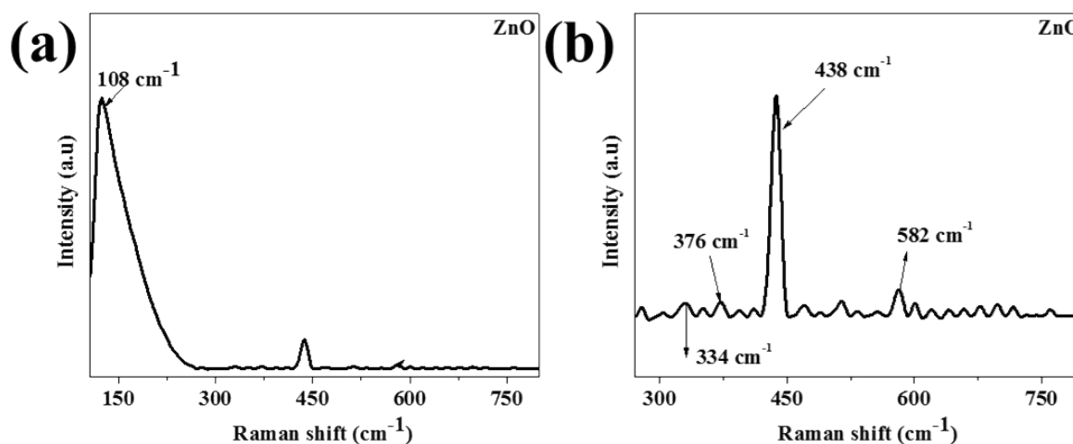

**Fig. S5** Laser Raman spectrum of (a) ZnO and (b) expansion of the laser Raman spectrum of ZnO to show the low-intensity peaks.

Laser Raman spectroscopy was also used to confirm that pure  $\text{WO}_3$  was synthesized using the resin gel synthesis. Several peaks were observed on the laser Raman spectrum of  $\text{WO}_3$ , which were all accounted for, thus further confirming that the material synthesized was indeed pure hexagonal  $\text{WO}_3$  (**Fig. S6**). The peaks observed at 131 and 194  $\text{cm}^{-1}$  were attributed to the lattice vibration modes. The peak at 260 and 326  $\text{cm}^{-1}$  were attributed to the  $\text{W}^{6+}=\text{O}$  stretching vibrations. The peak observed at 702  $\text{cm}^{-1}$  was attributed to the asymmetric stretching vibration of W-O-W whereas that which was observed at 803  $\text{cm}^{-1}$  was attributed to the symmetry stretching of the same bond.

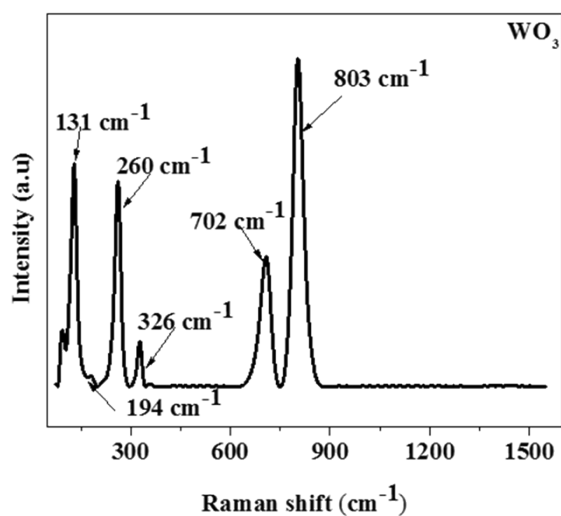

**Fig. S6.** Laser Raman spectrum of  $\text{WO}_3$ .

The crystal structure of  $\text{TiO}_2$  nanoparticles was also investigated by laser Raman spectroscopy as shown in **Fig. S7**. The Raman active modes observed at  $146\text{ cm}^{-1}(\text{E}_g)$ ,  $396\text{ cm}^{-1}(\text{B}_{1g})$ ,  $518\text{ cm}^{-1}(\text{A}_{1g})$ , and  $641\text{ cm}^{-1}(\text{E}_g)$  were all typical of the anatase phase of  $\text{TiO}_2$ , in agreement with PXRD data.

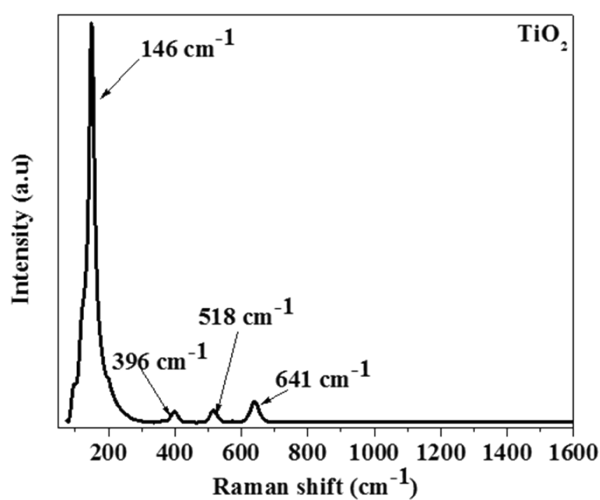

**Fig. S7.** Laser Raman spectrum of  $\text{TiO}_2$ .

### (S6) PXRD of calcined pure metal oxides

TiO<sub>2</sub> and the QMMOs were calcined at 800 °C in the air to attempt to induce phase changes in the materials. Firstly, the PXRD patterns of pure metal oxides were analyzed (**Fig. S3**). It was observed that the PXRD pattern of ZnO calcined at 800 °C was similar to that of the un-calcined material (**Fig. S8a**), except for that the peaks were sharper indicating improved crystallinity, which typically happens when materials are subjected to higher temperatures.

In the case of WO<sub>3</sub>, there was a slight difference observed in the two PXRD patterns (calcined at 800 °C and 400 °C). The disappearance of the (100) reflection at 16 ° was observed when the two patterns were compared (**Fig. S8b**). A similar PXRD pattern was reported by Leghari *et al.*, who assigned the pattern as of monoclinic WO<sub>3</sub>.<sup>3</sup> Furthermore, Szilagyi *et al.* observed that having calcined hexagonal WO<sub>3</sub> to temperatures beyond 550 °C, it changed into its monoclinic form.<sup>4</sup>

The PXRD pattern of TiO<sub>2</sub> after it had been calcined at 800 °C was totally different from that of TiO<sub>2</sub> before it was calcined (**Fig. S8c**). The reflections were observed at 2θ positions of: 32, 43, 46, 49, 52, 64, 67, 75 and 77 °, indexed as: (110), (101), (111), (211), (220), (002), (311), (301) and (112) (JC JCPDS, no. 21-1276) respectively. The peaks were consistent with those of tetragonal rutile phase.

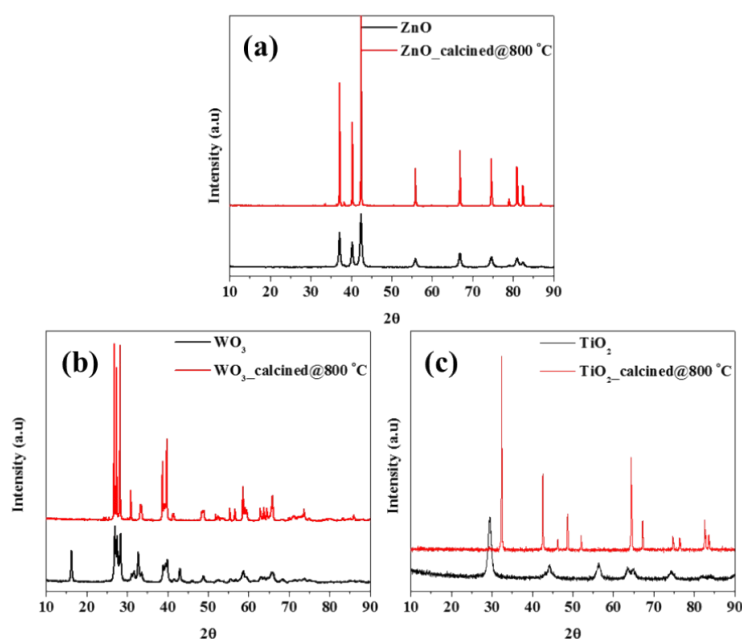

**Fig. S8 PXRD patterns of pure metal oxides before (calcined only at 400 °C) and after calcining at 800 °C.**

### (S7) PXRD of QMMOs supported on NCNTs

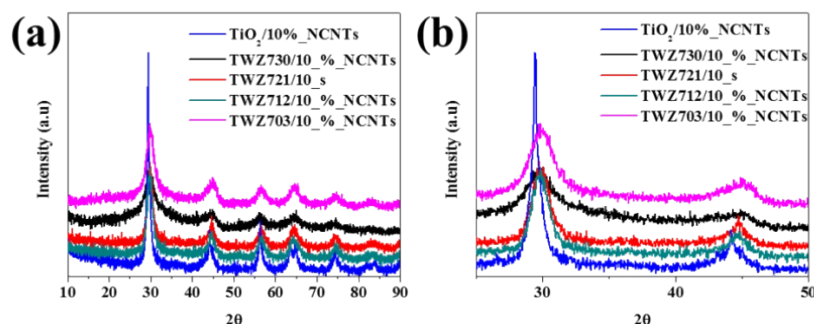

**Fig. S9 (a) PXRD patterns of TiO<sub>2</sub>/QMMOs and 10 % NCNTs composites and (b) insert showing the (101) reflection.**

PXRD analyses were also done on the TiO<sub>2</sub>/QMMOs and NCNTs composites in order to investigate the crystallographic properties of the materials. The PXRD patterns of the composites were found to be similar to those of TiO<sub>2</sub> and QMMOs, suggesting that the addition of NCNTs and the modified synthesis procedure did not alter the formation of QMMOs and TiO<sub>2</sub> (**Fig. S3a**). Moreover, the centroid of the (101) reflection of TiO<sub>2</sub> was observed at a lower 2θ values relative to those of QMMOs as it was the case with QMMOs (not supported on NCNTs) as shown in **Fig. S3b**. This was an indication that even the modified synthesis method yielded QMMOs.

### (S8) TGA analyses

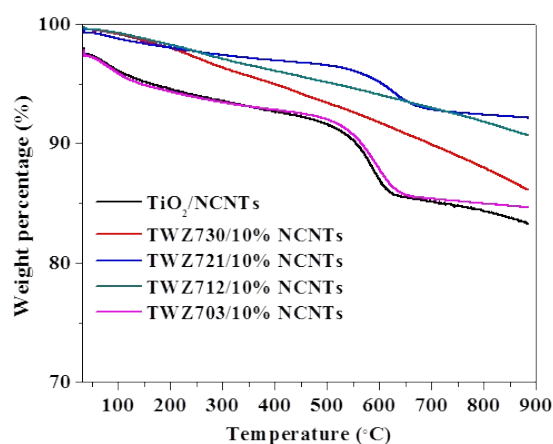

**Fig. S10 Thermograms of TiO<sub>2</sub> and QMMOs loaded onto 10 % NCNTs**

TGA analyses were conducted on the composites in order to determine if NCNTs were part of the composites as it was observed by TEM (**Fig. 11**). The thermograms showed that the materials were thermally stable with less than 15 % of the material combusting at temperatures between 32 and 900 °C in oxygen (**Fig. S4**). The stability of the materials is typical of metal oxides as they are able to withstand high temperatures

without combusting. The small amount of material (>15 %) was attributed to the NCNTs onto which  $\text{TiO}_2$  and the QMMOs were loaded onto. During the synthesis of the samples, 10 % of the materials were NCNTs, the small discrepancies observed on the thermograms were attributed to the inhomogeneity of the samples. Nevertheless, the amounts combusted were estimated to be between 7-14 % of the materials from the thermograms which were close to the pre-calculated 10 %.

(S8)

#### (S9) Photocatalytic efficiencies

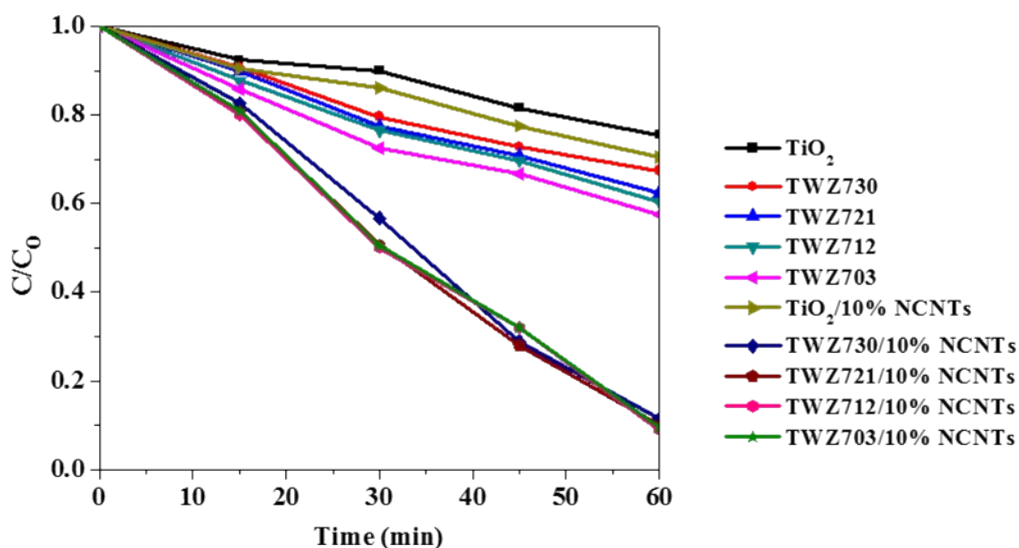

Fig. S11 Photocatalytic efficiencies of  $\text{TiO}_2$ , QMMOs, and composites.

#### (S10) Photocurrent measurements

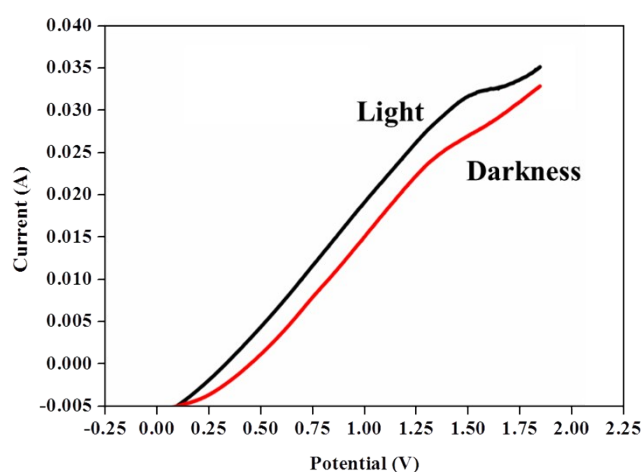

Fig. S12 Linear sweep voltammetry of TWZ712/10% NCNTs.

Linear sweep voltammetric studies of TWZ712/10 % showed the current response over an applied potential range was higher when the photocatalyst was irradiated as opposed when

the measurements were conducted in the dark. Further showing the viability of the material as a photocatalyst.

## References

- 1 L. Hlekelele, P. J. Franklyn, F. Dziike and S. H. Durbach, *New J. Chem.*, 2018, **42**, 1902-1912.
- 2 L. Hlekelele, P. J. Franklyn, F. Dziike and S. H. Durbach, *New J. Chem.*, 2018, **42**, 4531–4542.
- 3 S. A. Khan Leghari, S. Sajjad and J. Zhang, *RSC Adv.*, 2014, **4**, 5248-5253.
- 4 I. M. Szilágyi, S. Saukko, J. Mizsei, A. L. Tóth, J. Madarász and G. Pokol, in *Solid State Sciences*, 2010, **12**, 1857-1860.
